# Supplementary material for: Myeloid-derived miR-6236 potentiates adipocyte insulin signaling and prevents hyperglycemia during obesity
Source: PubMed Central journal article supplement (PMC11199588; doi:10.1038/s41467-024-49632-z), 2024-06-25
Supplement: 41467_2024_49632_MOESM3_ESM.pdf [file 41467_2024_49632_MOESM3_ESM.pdf]

## Description of Additional Supplementary Files

**Supplementary Data 1: Table of key reagents and primers.** Table of key reagents, sources, and primers.
